# Supplementary material for: Targeted disruption of pi–pi stacking in Malaysian banana lectin reduces mitogenicity while preserving antiviral activity
Source: PubMed Central journal article supplement (PMC7804308; doi:10.1038/s41598-020-80577-7), 2021-01-12
Supplement: 41598_2020_80577_MOESM1_ESM.pdf [file 41598_2020_80577_MOESM1_ESM.pdf]

## Supplementary Information

### Targeted disruption of pi-pi stacking in Malaysian banana lectin reduces mitogenicity while preserving antiviral activity

*Evelyn M. Covés-Datson*<sup>1,2</sup>, *Steven R. King*<sup>3</sup>, *Maureen Legendre*<sup>3</sup>, *Michael D. Swanson*<sup>4,12</sup>, *Auroni Gupta*<sup>3</sup>,  
*Sandra Claes*<sup>5</sup>, *Jennifer L. Meagher*<sup>6</sup>, *Arnaud Boonen*<sup>5</sup>, *Lihong Zhang*<sup>7</sup>, *Birte Kalveram*<sup>7</sup>, *Zoe Raglow*<sup>3</sup>,  
*Alexander N. Freiberg*<sup>7</sup>, *Mark Prichard*<sup>8</sup>, *Jeanne A. Stuckey*<sup>6,9</sup>, *Dominique Schols*<sup>5</sup>, *David M.*  
*Markovitz*<sup>3,4,10,11\*</sup>

<sup>1</sup>Medical Scientist Training Program, University of Michigan, Ann Arbor MI 48109; <sup>2</sup>Department of Microbiology & Immunology, University of Michigan, Ann Arbor MI 48109; <sup>3</sup>Department of Internal Medicine, Division of Infectious Diseases, University of Michigan, Ann Arbor MI 48109; <sup>4</sup>Graduate Program in Immunology, University of Michigan, Ann Arbor MI 48109; <sup>5</sup>Laboratory of Virology and Chemotherapy, Rega Institute for Medical Research, University of Leuven, 3000 Leuven, Belgium; <sup>6</sup>Life Sciences Institute, University of Michigan, Ann Arbor MI 48109; <sup>7</sup>Department of Pathology, University of Texas Medical Branch, Galveston TX 77555; <sup>8</sup>University of Alabama Health Services Foundation Diagnostic Virology Laboratory, University of Alabama at Birmingham, Birmingham AL 35294; <sup>9</sup>Department of Biological Chemistry, University of Michigan, Ann Arbor MI 48109; <sup>10</sup>Cellular and Molecular Biology Program, University of Michigan, Ann Arbor MI 48109; <sup>11</sup>Cancer Biology Program, University of Michigan, Ann Arbor MI 48109; Present Address: Predictive and Clinical Immunogenicity, Merck and Co., Inc, Kenilworth NJ 07033

#### Material included:

Table S1

**Table S1.** Crystallography Data Collection and Refinement Statistics.

| <b>Data Collection</b>         | <b>WT Malay BanLec</b>           | <b>F84T Malay BanLec</b>                      |
|--------------------------------|----------------------------------|-----------------------------------------------|
| PDBID                          | 6OPR                             | 6OQ0                                          |
| Space Group                    | P4 <sub>3</sub> 2 <sub>1</sub> 2 | P2 <sub>1</sub> 2 <sub>1</sub> 2 <sub>1</sub> |
| Unit Cell (Å)                  | 52.526, 52.526,<br>221.307       | 79.247, 157.871,<br>204.101                   |
| Wavelength (Å)                 | 0.9786                           | 0.9786                                        |
| Resolution (Å) <sup>1</sup>    | 1.51 (1.51 – 1.54)               | 1.80 (1.80 – 1.83)                            |
| R <sub>sym</sub> <sup>2</sup>  | 0.060 (0.414)                    | 0.084 (0.662)                                 |
| <I/σI> <sup>3</sup>            | 20 (5)                           | 10 (2)                                        |
| Completeness (%) <sup>4</sup>  | 99.5 (98.4)                      | 99.8 (99.5)                                   |
| Redundancy                     | 14.0 (11.7)                      | 7.1 (6.9)                                     |
| <b>Refinement</b>              |                                  |                                               |
| Resolution (Å)                 | 1.51                             | 1.80                                          |
| R-Factor <sup>5</sup>          | 18.4                             | 20.2                                          |
| R <sub>free</sub> <sup>6</sup> | 20.2                             | 23.4                                          |
| Protein atoms                  | 2117                             | 16861                                         |
| Water Molecules                | 363                              | 2240                                          |
| Unique Reflections             | 49784                            | 229852                                        |
| R.m.s.d. <sup>7</sup>          |                                  |                                               |
| Bonds                          | 0.008                            | 0.008                                         |
| Angles                         | 0.99                             | 1.07                                          |
| MolProbity Score (1)           | 0.92                             | 0.93                                          |
| Clash Score (1)                | 0.70                             | 0.76                                          |

<sup>1</sup>Statistics for highest resolution bin of reflections in parentheses.

<sup>2</sup> $R_{\text{sym}} = \frac{\sum_h \sum_j |I_{hj} - \langle I_h \rangle|}{\sum_h \sum_j I_{hj}}$ , where  $I_{hj}$  is the intensity of observation  $j$  of reflection  $h$  and  $\langle I_h \rangle$  is the mean intensity for multiply recorded reflections.

<sup>3</sup>Intensity signal-to-noise ratio.

<sup>4</sup>Completeness of the unique diffraction data.

<sup>5</sup>R-factor =  $\frac{\sum_h | |F_o| - |F_c| |}{\sum_h |F_o|}$ , where  $F_o$  and  $F_c$  are the observed and calculated structure factor amplitudes for reflection  $h$ .

<sup>6</sup> $R_{\text{free}}$  is calculated against a 5% random sampling of the reflections that were removed before structure refinement.

<sup>7</sup>Root mean square deviation of bond lengths and bond angles.

## References

1. Chen, V. B., Arendall, W. B., Headd, J. J., Keedy, D. A., Immormino, R. M., Kapral, G. J., Murray, L. W., Richardson, J. S., and Richardson, D. C. (2010) *MolProbity*: all-atom structure validation for macromolecular crystallography. *Acta Crystallogr. Sect. D Biol. Crystallogr.* **66**, 12–21
